# Supplementary material
Source: PubMed Central journal article supplement (PMC10658760)

## Supplementary Materials

England BR et al. Burden and Trajectory of Multimorbidity in Rheumatoid Arthritis: A Matched Cohort Study from 2006-2015

**Table S1.** Diagnostic codes used for identification of chronic conditions.

**Table S2.** Prevalence of chronic conditions at baseline in RA vs. non-RA.

**Figure S1.** Skewness and residuals from generalized estimating equations models specifying a Gaussian or negative binomial distribution of multimorbidity burden.

Histograms and measures of skewness for generalized estimating equations models of multimorbidity trajectory specifying a Gaussian (panel A) or negative binomial (panel B) distribution.

**Figure S2.** Mean number of chronic conditions observed over time in RA and non-RA.

Observed (raw) mean number of chronic conditions over follow-up in RA and non-RA as well as the number of patients at each time point.

**Figure S3.** Predicted burden of multimorbidity in incident rheumatoid arthritis compared to non-rheumatoid arthritis patients after diagnosis in sensitivity analyses.

Predicted burden of chronic conditions from generalized estimating equation models comparing rheumatoid arthritis and non-rheumatoid arthritis patients. Shown are the coefficients for the number of chronic conditions in RA vs. non-RA and the interaction term between RA status and follow-up time (years) from generalized estimating equations models. Panel A, primary approach requiring 1 year in the dataset without RA diagnostic codes or medications. Panel B, requiring at least 1 year of follow-up after the index date. Panel C, censoring the pair for drop out by either of the matched RA or non-RA patients. Panel D, requiring 2 years in the dataset without RA diagnostic codes or medications. Panel E, only requiring at least 1 diagnostic code

for a condition to be present. Panel F, adjusting for baseline number of chronic conditions.

Panel G, removing silent chronic conditions (hypertension, hyperlipidemia, diabetes mellitus, hypothyroid, osteoporosis, and anemia).

| <b>Supplementary Table 1.</b> Diagnostic codes used for identification of chronic conditions. |                                                                                                            |
|-----------------------------------------------------------------------------------------------|------------------------------------------------------------------------------------------------------------|
| <b>Condition</b>                                                                              | <b>ICD-9-CM Codes</b>                                                                                      |
| Congestive heart failure                                                                      | 398.91, 402.01, 402.11, 402.91, 404.01, 404.03, 404.11, 404.13, 404.91, 404.93, 425.4-425.9, 428.x         |
| Peripheral vascular disease / aneurysm                                                        | 093.0, 437.3, 440.x, 441.x, 443.1-443.9, 447.1, 557.1, 557.9, V43.4                                        |
| Cardiac arrhythmias                                                                           | 426.0, 426.13, 426.7, 426.9, 426.10, 426.12, 427.0-427.4, 427.6-427.9, 785.0, 996.01, 996.04, V45.0, V53.3 |
| Pulmonary circulation disorders                                                               | 415.0, 415.1, 416.x, 417.0, 417.8, 417.9                                                                   |
| Hypertension                                                                                  | 401.x, 402.x-405.x                                                                                         |
| Valvular heart disease                                                                        | 093.2, 394.x-397.x, 424.x, 746.3-746.6, V42.2, V43.3                                                       |
| Coronary artery disease                                                                       | 410.x-414.x, 429.7, V45.81, V45.82                                                                         |
| Asthma                                                                                        | 493.x (excluding 493.81)                                                                                   |
| Chronic obstructive pulmonary disease                                                         | 491.x-492.x, 496.x                                                                                         |
| Interstitial lung disease                                                                     | 515.x, 516.3, 516.8-516.9, 714.8                                                                           |
| Cerebrovascular disease                                                                       | 362.34, 430.x-438.x                                                                                        |
| Dementia                                                                                      | 290.x, 294.1, 331.2                                                                                        |
| Severe vision reduction                                                                       | 361.x-362.x, 363.8-363.9, 365.x-366.x, 369.x, 370.x, 377.0-377.2, 377.4-377.9                              |
| Hearing loss                                                                                  | 389.x                                                                                                      |
| Neuropathy                                                                                    | 350.x-357.x                                                                                                |
| Chronic headache                                                                              | 339.x, 346.x, 784.0                                                                                        |
| Parkinson's disease                                                                           | 332.x                                                                                                      |

|                                        |                                                                                                                                         |
|----------------------------------------|-----------------------------------------------------------------------------------------------------------------------------------------|
| Peptic ulcer disease                   | 531.x–534.x                                                                                                                             |
| Liver disease                          | 070.22, 070.23, 070.32, 070.33, 070.44, 070.54, 070.6, 070.9, 456.0-456.2, 570.x, 571.x, 572.2-572.8, 573.3, 573.4, 573.8, 573.9, V42.7 |
| Diverticulitis/diverticulosis          | 562.x                                                                                                                                   |
| Gastroesophageal reflux disease        | 530.11, 530.81; 530.85                                                                                                                  |
| Diabetes                               | 250.x                                                                                                                                   |
| Hypothyroid                            | 240.9, 243.x, 244.x, 246.1, 246.8                                                                                                       |
| Obesity                                | 278.0                                                                                                                                   |
| Hyperlipidemia                         | 272.0, 272.2-272.4                                                                                                                      |
| Renal disease                          | 403.01, 403.11, 403.91, 404.02, 404.03, 404.12, 404.13, 404.92, 404.93, 582.x, 583.0–583.7, 585.x, 586.x, 588.0, V42.0, V45.1, V56.x    |
| Prostatic hyperplasia                  | 600.x                                                                                                                                   |
| Urinary incontinence                   | 788.3                                                                                                                                   |
| Non-inflammatory gynecologic disorders | 618.x; 620.x-624.x; 626.x-627.x                                                                                                         |
| Cancer                                 | 140.x–172.x, 174.x–208.x, V10.60-10.63, V10.69, V10.71-V10.72, V10.79                                                                   |
| Chronic back pain disorders            | 720.1-724.x                                                                                                                             |
| Osteoarthritis                         | 715.x, v13.4                                                                                                                            |
| Gout                                   | 274.x                                                                                                                                   |
| Osteoporosis                           | 733.0                                                                                                                                   |

|                                |                                                                                                         |
|--------------------------------|---------------------------------------------------------------------------------------------------------|
| Inflammatory skin diseases     | 690.x, 694.x-698.x                                                                                      |
| Fibromyalgia                   | 729.1                                                                                                   |
| Anemia                         | 280.x-285.x                                                                                             |
| Alcohol abuse                  | 265.2, 291.1-291.3, 291.5-291.9, 303.0,<br>303.9, 305.0, 357.5, 425.5, 535.3, 571.0-571.3, 980.x, V11.3 |
| Drug abuse                     | 292.x, 304.x, 305.2-305.9, V65.42                                                                       |
| Depression                     | 296.2, 296.3, 300.4, 309.x, 311.x                                                                       |
| Bipolar                        | 296.0-296.1, 296.4-296.8                                                                                |
| Anxiety                        | 293.84, 300.x, 308.x                                                                                    |
| Post-traumatic stress disorder | 309.81                                                                                                  |
| Sleep disorder                 | 307.4, 780.5                                                                                            |

| <b>Supplementary Table 2.</b> Prevalence of individual chronic conditions in RA vs. non-RA at baseline (n=277,782). |              |                  |                         |
|---------------------------------------------------------------------------------------------------------------------|--------------|------------------|-------------------------|
| Condition                                                                                                           | RA<br>N (%)  | Control<br>N (%) | Conditional OR (95% CI) |
| Alcohol abuse                                                                                                       | 203 (0.2)    | 181 (0.1)        | 1.12 (0.92, 1.37)       |
| Anemia                                                                                                              | 6105 (4.4)   | 2498 (1.8)       | 2.56 (2.44, 2.69)       |
| Anxiety                                                                                                             | 3173 (2.3)   | 2225 (1.6)       | 1.45 (1.37, 1.53)       |
| Asthma                                                                                                              | 4385 (3.2)   | 2389 (1.7)       | 1.88 (1.79, 1.98)       |
| Bipolar                                                                                                             | 303 (0.2)    | 264 (0.2)        | 1.15 (0.97, 1.36)       |
| Benign prostatic hyperplasia*                                                                                       | 1061 (3.3)   | 820 (2.5)        | 1.33 (1.21, 1.46)       |
| Cancer                                                                                                              | 3891 (2.8)   | 4225 (3.0)       | 0.92 (0.88, 0.96)       |
| Cardiac arrhythmia                                                                                                  | 3654 (2.6)   | 2652 (1.9)       | 1.42 (1.35, 1.49)       |
| Cerebrovascular disease                                                                                             | 1522 (1.1)   | 1218 (0.9)       | 1.26 (1.17, 1.36)       |
| Chronic back pain                                                                                                   | 19968 (14.4) | 10203 (7.4)      | 2.23 (2.17, 2.29)       |
| CHF                                                                                                                 | 1720 (1.2)   | 1237 (0.9)       | 1.41 (1.31, 1.52)       |
| COPD                                                                                                                | 3378 (2.4)   | 1872 (1.4)       | 1.86 (1.75, 1.97)       |
| Coronary artery disease                                                                                             | 5264 (3.8)   | 3753 (2.7)       | 1.46 (1.39, 1.52)       |
| Dementia                                                                                                            | 60 (0.04)    | 126 (0.1)        | 0.48 (0.35, 0.65)       |
| Depression                                                                                                          | 4332 (3.1)   | 2633 (1.9)       | 1.69 (1.60, 1.77)       |
| Diabetes                                                                                                            | 10,681 (7.7) | 8,790 (6.3)      | 1.24 (1.21, 1.28)       |
| Diverticular disease                                                                                                | 870 (0.6)    | 586 (0.4)        | 1.49 (1.34, 1.66)       |
| Drug abuse                                                                                                          | 202 (0.2)    | 125 (0.1)        | 1.62 (1.30, 2.03)       |
| Fibromyalgia                                                                                                        | 6524 (4.7)   | 1212 (0.9)       | 5.86 (5.50, 6.25)       |
| GERD                                                                                                                | 5673 (4.1)   | 3035 (2.2)       | 1.94 (1.85, 2.03)       |
| Gout                                                                                                                | 1458 (1.1)   | 475 (0.3)        | 3.15 (2.83, 3.50)       |
| Headaches                                                                                                           | 4174 (3.0)   | 2648 (1.9)       | 1.62 (1.54, 1.70)       |
| Hearing loss                                                                                                        | 698 (0.5)    | 470 (0.3)        | 1.49 (1.33, 1.68)       |
| Hyperlipidemia                                                                                                      | 14947 (10.8) | 12103 (8.7)      | 1.30 (1.26, 1.33)       |

|                                |              |              |                      |
|--------------------------------|--------------|--------------|----------------------|
| Hypertension                   | 27176 (19.6) | 20313 (14.6) | 1.51 (1.48, 1.54)    |
| Hypothyroid                    | 7247 (5.2)   | 4189 (3.0)   | 1.80 (1.73, 1.88)    |
| Interstitial lung disease      | 1620 (1.2)   | 133 (0.1)    | 12.62 (10.54, 15.11) |
| Inflammatory skin disease      | 4603 (3.3)   | 1724 (1.2)   | 2.77 (2.61, 2.93)    |
| Liver disease                  | 982 (0.7)    | 527 (0.4)    | 1.88 (1.69, 2.09)    |
| Neuropathy                     | 6464 (4.7)   | 2310 (1.7)   | 2.98 (2.83, 3.13)    |
| Non-inflammatory gynecologic** | 12890 (12.1) | 11299 (10.6) | 1.16 (1.13, 1.20)    |
| Obesity                        | 2499 (1.8)   | 1571 (1.1)   | 1.61 (1.51, 1.72)    |
| Osteoarthritis                 | 19133 (13.8) | 4718 (3.4)   | 5.16 (4.98, 5.35)    |
| Osteoporosis                   | 3373 (2.4)   | 780 (0.6)    | 4.54 (4.19, 4.92)    |
| Parkinson's                    | 172 (0.1)    | 216 (0.2)    | 0.80 (0.65, 0.97)    |
| Pulmonary circulation disorder | 680 (0.5)    | 328 (0.2)    | 2.08 (1.83, 2.38)    |
| Peptic ulcer disease           | 342 (0.3)    | 157 (0.1)    | 2.18 (1.80, 2.63)    |
| Peripheral vascular disease    | 1284 (0.9)   | 822 (0.6)    | 1.58 (1.45, 1.73)    |
| PTSD                           | 62 (0.04)    | 36 (0.03)    | 1.72 (1.14, 2.60)    |
| Renal disease                  | 1589 (1.1)   | 1096 (0.8)   | 1.47 (1.36, 1.59)    |
| Severe vision reduction        | 4270 (3.1)   | 2948 (2.1)   | 1.49 (1.42, 1.56)    |
| Sleep disorder                 | 3044 (2.2)   | 1651 (1.2)   | 1.88 (1.76, 1.99)    |
| Urinary Incontinence           | 758 (0.6)    | 414 (0.3)    | 1.85 (1.64, 2.08)    |
| Valvular heart disease         | 1282 (0.9)   | 828 (0.6)    | 1.56 (1.43, 1.71)    |
| *males only, **females only    |              |              |                      |

**Supplementary Figure 1.** Skewness and residuals from generalized estimating equations models specifying a Gaussian or negative binomial distribution of multimorbidity burden.

**A. Gaussian Distribution**

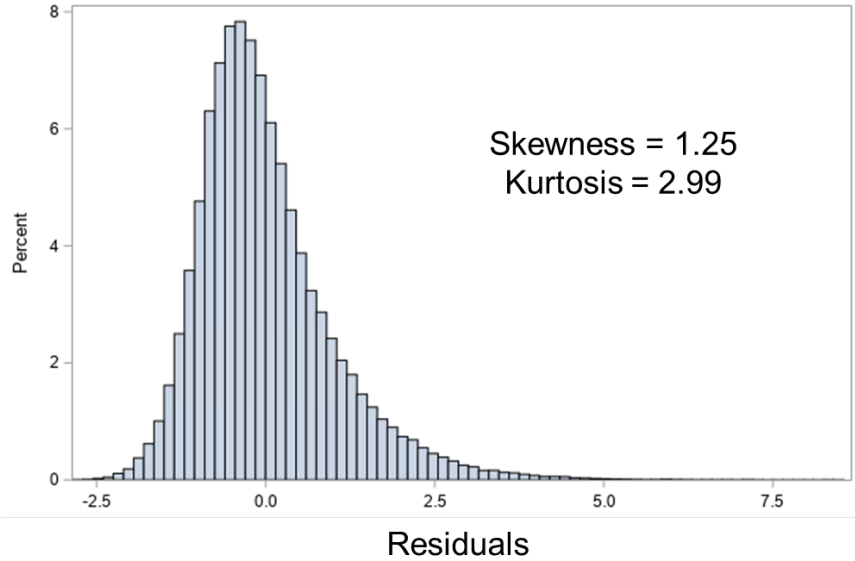

**B. Negative Binomial Distribution**

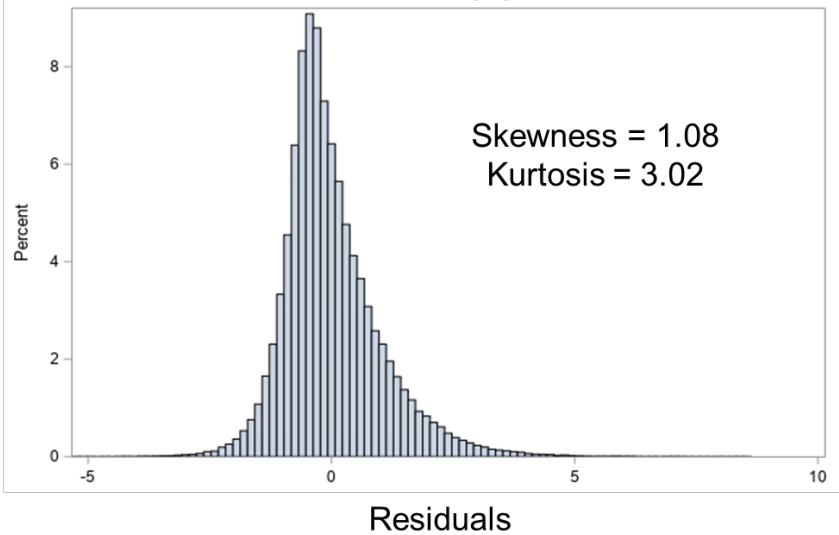



**Supplementary Figure 2.** Mean number of chronic conditions observed over time in RA and non-RA.

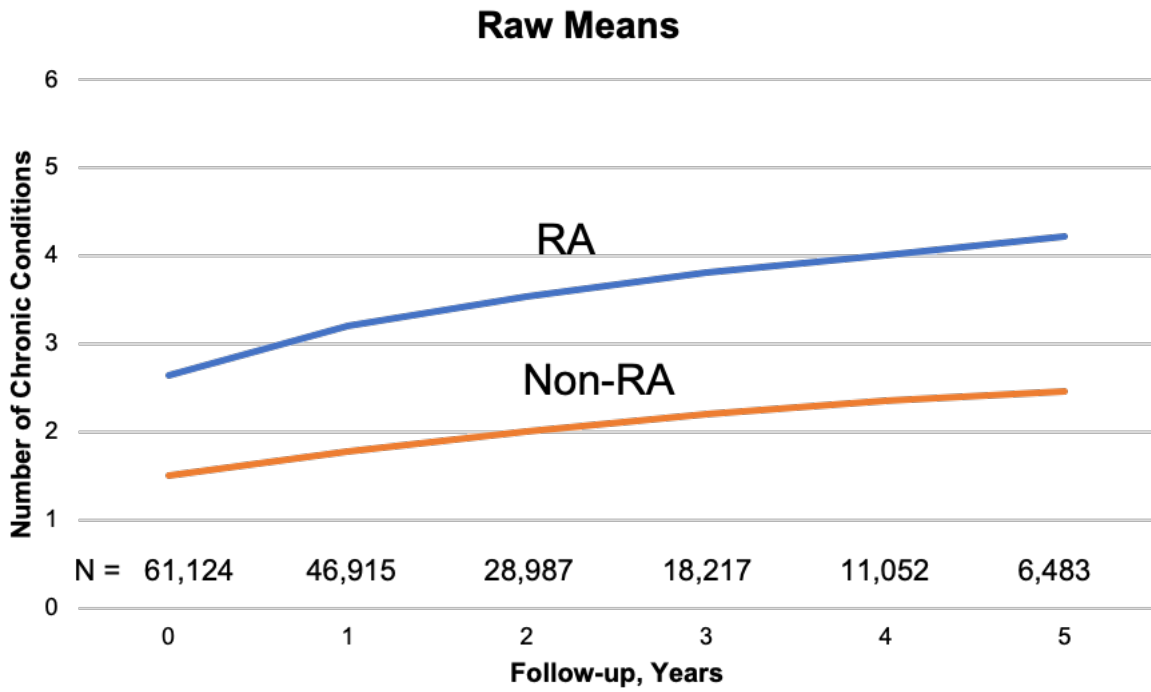

**Supplementary Figure 3.** Predicted burden of multimorbidity in incident rheumatoid arthritis compared to non-rheumatoid arthritis patients after diagnosis in sensitivity analyses.

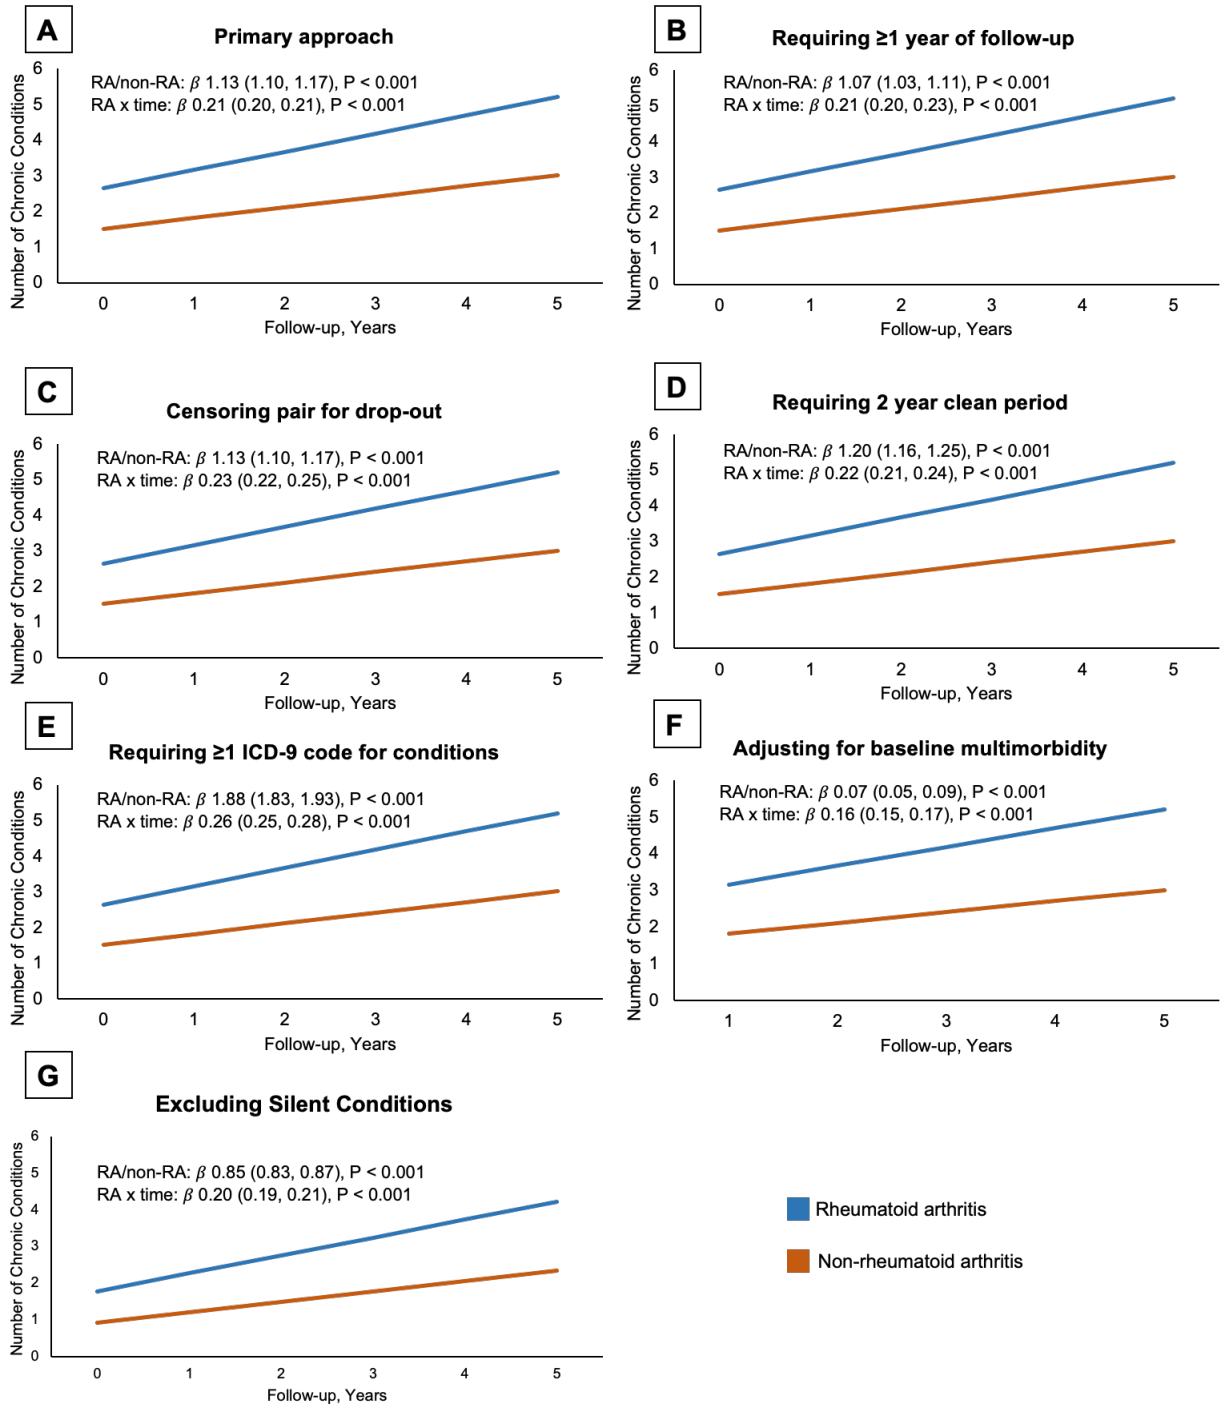

Supplement: NIHMS1942379-supplement-Supplement.pdf [file NIHMS1942379-supplement-Supplement.pdf]
